# Supplementary material for: Genotype-Phenotype of Patients with PRPH2-Associated Retinal Dystrophy: Novel Insights on Foveal Structure and Visual Outcomes
Source: Research Square preprint supplement (doi:10.21203/rs.3.rs-8587127/v1), 2026-02-13
Supplement: Supplementary file 1 [file 1243813d976e32876fbe43c1.docx]

**Supplementary Materials**

**Genotype-Phenotype of Patients with *PRPH2*-Associated Retinal Dystrophy: Novel Insights on Foveal Structure and Visual Outcomes**

**Supplementary Figure 1.** Four phenotypic groups in *PRPH2*-IRD.

**Supplementary Figure 2.** Phenotype-specific methodology for measuring CMT and EZ thickness.

**Supplementary Table 1.** Causative *PRPH2* variants in the study cohort.

**Supplementary Table 2.** Phenotypic and genotypic analysis of the study cohort.

**Supplementary Table 3.** Characteristics of PRPH2-IRD patients included in the CMT thickness quantitative analysis.

**Supplementary Table 4.** Characteristics of PRPH2-IRD patients included in the EZ thickness quantitative analysis.


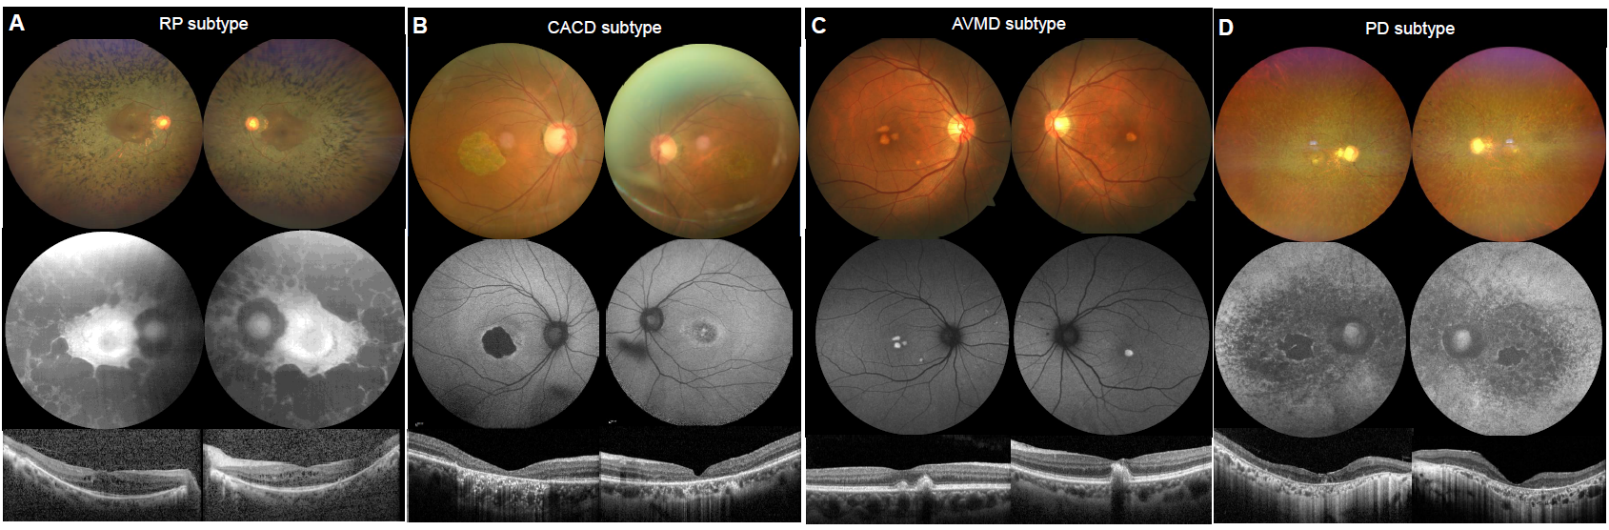


**Supplementary Figure 1.** Four phenotypic groups in *PRPH2*-IRD. **(A)** RP subtype: peripheral-to-central progression featuring mid-peripheral outer retinal thinning with foveal sparing. **(B)** CACD subtype: macular-predominant degeneration with RPE-choroid atrophy, and EZ loss. **(C)** AVMD subtype: progressive EZ-RPE elevation in OCT. Bilateral foveal yellow and round lesions in CFP. **(D)** PD subtype: Bilateral irregular lesions with decreased FAF in the fovea.

**Abbreviation:** IRD, inherited retinal dystrophy, RP, retinitis pigmentosa; CACD, central areolar choroidal dystrophy; AVMD, adult vitelliform macular dystrophy; PD, pattern dystrophy; RPE, retinal pigment epithelium; EZ, ellipsoid zone; OCT, optical coherence tomography; CFP, color fundus photograph; FAF, fundus autofluorescence.


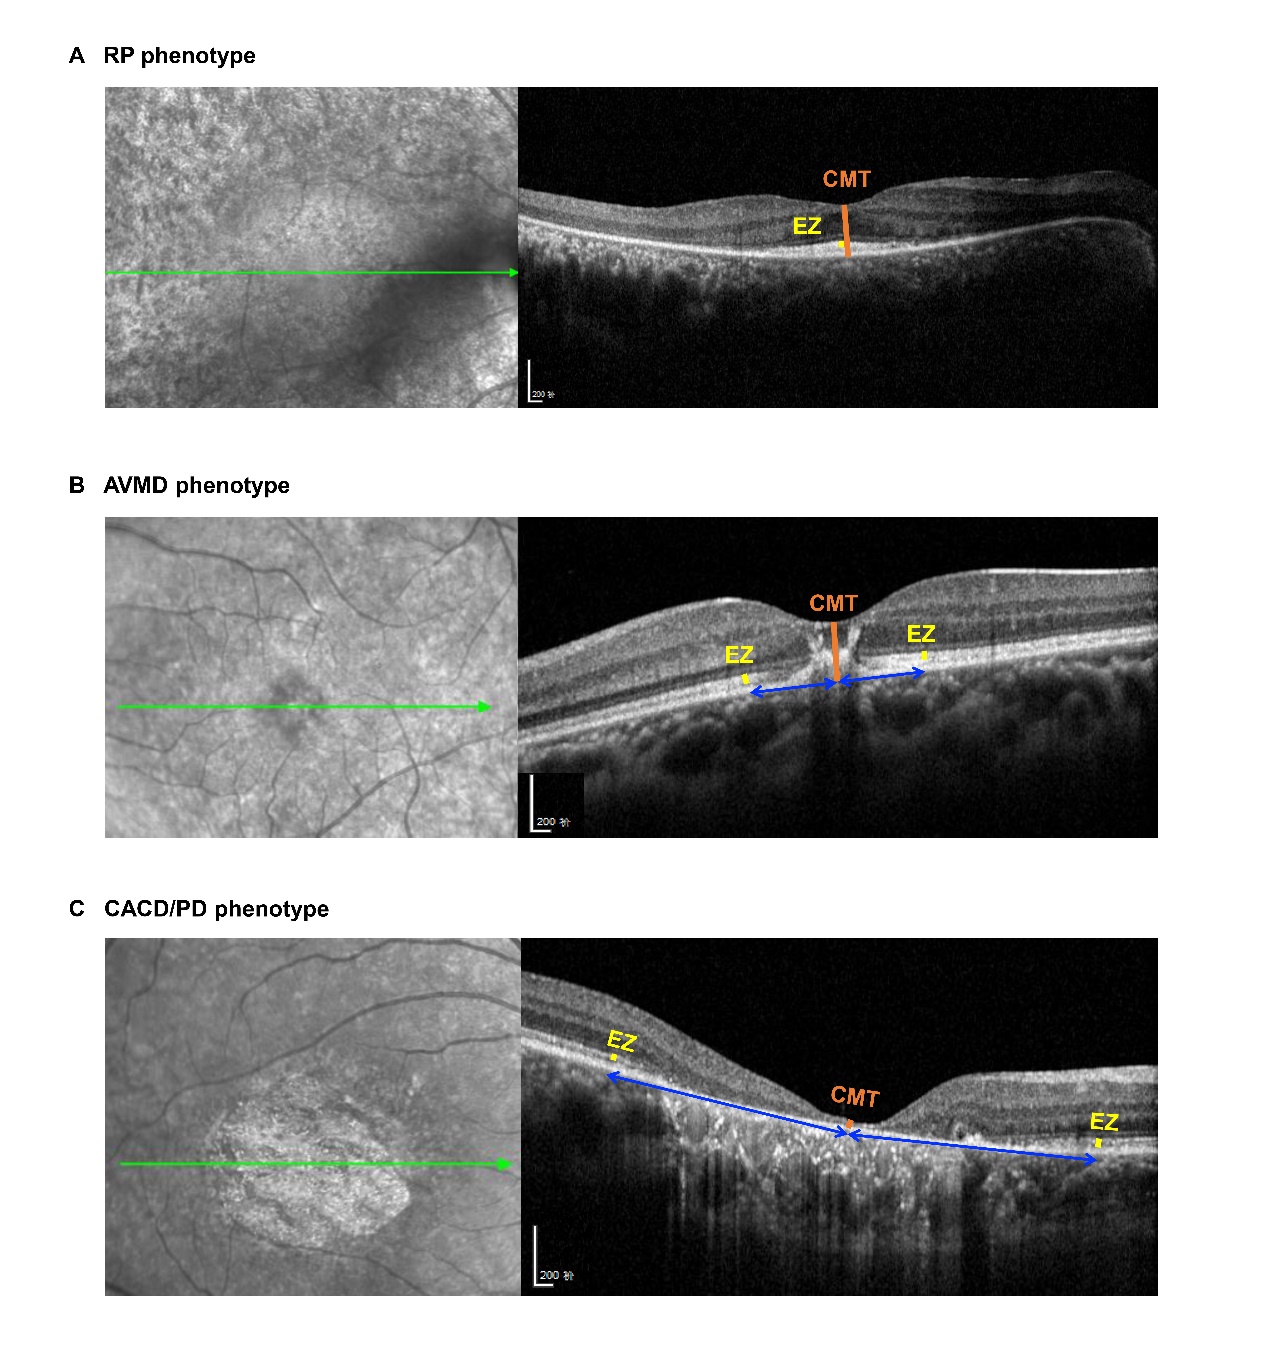


**Supplementary Figure 2.** Phenotype-specific methodology for measuring CMT and EZ thickness.

**(A)** In RP, the CMT and EZ thickness were measured at the center of the fovea.

**(B)** In AVMD with central involvement, EZ thickness measurements were taken in the nearest unaffected macular regions bilaterally symmetric to the fovea, and the average was calculated. The CMT was measured in the central macular.

**(C)** In CACD/PD with geographic atrophy, EZ thickness measurements were obtained from preserved macular areas located symmetrically outside the margin of atrophy, and the bilateral mean was used for analysis. The CMT was measured in the central macular.

**Abbreviation:** CMT, central macular thickness; EZ, ellipsoid zone; RP, retinitis pigmentosa; AVMD, adult vitelliform macular dystrophy; CACD, central areolar choroidal dystrophy; PD, pattern dystrophy.

## **Supplementary Table 1.** Causative *PRPH2* variants in the study cohort.

| **ID** | **Diagnosis** | **Nucleotide change** | **Protein changes** | **Type** | **Co-Seg** | **Exon** | **Mutation** | | | | **Source** |
| --- | --- | --- | --- | --- | --- | --- | --- | --- | --- | --- | --- |
| **SIFT** | **Polyphen2** | **Mutation taster** | **CADD** |
| 01 | RP | c.595_607dup | p.R203Qfs*19 | Frameshift | NA | 2 | NA | NA | DC | NA | Novel |
| 02 | AVMD | c.692C>A | p.S231X | Nonsense | NA | 2 | NA | NA | DC | 28.1 | Known |
| 03 | PD | c.424C>T | p.R142W | Missense | NA | 1 | Deleterious | Probably damaging | DC | 8.5 | Known |
| 04 | CACD | c.777del | p.S259Rfs*4 | Frameshift | NA | 2 | NA | NA | DC | NA | Novel |
| 06 | AVMD | c.28C>T | p.Q10X | Nonsense | NA | 1 | NA | NA | DC | 20.6 | Known |
| 10 | RP | c.458A>G | p.K153R | Missense | NA | 1 | Deleterious | Probably damaging | DC | 26.6 | Known |
| 1001 | RP | c.458A>G | p.K153R | Missense | NA | 1 | Deleterious | Probably damaging | DC | 26.6 | Known |
| 12 | RP | c.643A>C | p.N215H | Missense | NA | 2 | Deleterious | Possibly damaging | DC | 25.8 | Known |
| 13 | CACD | c.603_620dup | p.R203_G208dup | Nonframeshift insertion | NA | 2 | NA | NA | DC | NA | Novel |
| 15 | RP | c.911_912dup | p.G305Rfs*20 | Frameshift | NA | 3 | NA | NA | DC | NA | Novel |
| 17 | AVMD | c.578_579del | p.K193Rfs*24 | Frameshift | NA | 1 | NA | NA | DC | NA | Known |
| 19 | CACD | c.533A>G | p.Q178R | Missense | NA | 1 | Deleterious | Probably damaging | DC | 25.1 | Known |
| 21 | CACD | c.424C>T | p.R142W | Missense | NA | 1 | Deleterious | Probably damaging | DC | 8.5 | Known |
| 22 | RP | c.508G>A | p.G170S | Missense | NA | 1 | Tolerated | Benign | DC | 26.4 | Known |
| 24 | CACD | c.568A>G | p.K190E | Missense | NA | 1 | Tolerated | Benign | DC | 24.1 | Novel |
| 25 | RP | c.206T>C | p.V69A | Missense | NA | 1 | Tolerated | Benign | DC | 21.1 | Novel |
| 26 | CACD | c.698A>G | p.H233R | Missense | NA | 2 | Deleterious | Probably damaging | DC | 25.1 | Known |
| 29 | PD | c.647C>G | p.P216R | Missense | NA | 2 | Deleterious | Probably damaging | DC | 29.3 | Known |
| 30 | RP | c.136C>T | p.R46X | Nonsense | NA | 1 | NA | NA | DC | 37 | Known |
| 31 | RP | c.702C>G | p.Y234X | Nonsense | NA | 2 | NA | NA | DC | 38 | Novel |
| 32 | RP | c.469G>A | p.D157N | Missense | NA | 1 | Deleterious | Probably damaging | DC | 29.6 | Known |
| 33 | CACD | c.789del | p.S264Pfs*14 | Frameshift | NA | 2 | NA | NA | DC | NA | Novel |
| 3301 | AVMD | c.789del | p.S264Pfs*14 | Frameshift | NA | 2 | NA | NA | DC | NA | Novel |
| 36 | AVMD | c.826G>T | p.E276X | Nonsense | NA | 2 | NA | NA | DC | 43 | Known |
| 37 | RP | c.367C>T | p.R123W | Missense |  | 1 | Deleterious | Benign | DC | 22.4 | Known |
| 38 | RP | c.533A>G | p.Q178R | Missense | NA | 1 | Deleterious | Probably damaging | DC | 26.6 | Known |
| 40 | PD | c.599T>A | p.V200E | Missense |  | 2 | Deleterious | Possibly damaging | DC | 32 | Known |
| 4001 | CACD | c.599T>A | p.V200E | Missense |  | 2 | Deleterious | Possibly damaging | DC | 32 | Known |
| 41 | CACD | c.920_921insCTTGAGGAATCTGAGAGCGAGAGCCAGGGCTGGCT | p.E309Rfs*27 | Frameshift | NA | 3 | NA | NA | DC | NA | Novel |
| 42 | CACD | c.643A>C | p.N215H | Missense | NA | 2 | Deleterious | Possibly damaging | DC | 28.1 | Known |
| 43 | RP | c.646C>T | p.P216S | Missense | NA | 2 | Deleterious | Possibly damaging | DC | 28.3 | Known |
| 44 | RP | c.646C>G | p.P216A | Missense | NA | 2 | Deleterious | Possibly damaging | DC | 27.3 | Known |
| 45 | RP | c.595_607dup | p.R203Qfs*19 | Frameshift | NA | 2 | NA | NA | DC | NA | Novel |
| 46 | PD | c.920_921insCTTGAGGAATCTGAGAGCGAGAGCCAGGGCTGGCT | p.E309Rfs*27 | Frameshift | NA | 2 | NA | NA | DC | NA | Novel |

**Abbreviation:** Co-Seg,Co-Segregation; RP, retinitis pigmentosa; AVMD, adult vitelliform macular dystrophy; PD, pattern dystrophy; CACD, central areolar choroidal dystrophy; NA, none available; DC, disease causing.

## **Supplementary Table 2.** Phenotypic and genotypic analysis of the study cohort.

| **Characteristics** | **RP related mutations**  **(Protein domain)** | **CACD/PD related mutations**  **(Protein domain)** | **AVMD related mutations**  **(Protein domain)** |
| --- | --- | --- | --- |
| Nonsense | p.R46X (LD*) | \ | p.Q10X (CD) |
| p.Y234X (LD) | p.S231X (LD) |
|  | p.E276X (TM) |
| Missense | p.V69A (TM) | p.R142W (LD) | \ |
|  | p.R123W (TM) | p.Q178R (LD) |  |
|  | p.K153R (LD) | p.K190E (LD) |  |
|  | p.G170S (LD) | p.V200E (LD) |  |
|  | p.Q178R (LD) | p.N215H (LD) |  |
|  | p.N215H (LD) | p.P216R (LD) |  |
|  | p.P216S (LD)  p.P216A (LD) | p.H233R (LD) |  |
|  |  |  |  |
| Frameshift | p.R203Qfs*19 (LD) | p.S259Rfs*4 (LD) | p.K193Rfs*24 (LD) |
|  | p.G305Rfs*20 (CD) | p.S264Pfs*14 (LD) | p.S264Pfs*14 (LD) |
|  |  | p.E309Rfs*27 (CD) |  |
|  |  |  |  |
| Non-frameshift insertion | \ | p.R203_G208dup (LD) | \ |

**Abbreviation:** RP, retinitis pigmentosa; CACD, central areolar choroidal dystrophy; PD, pattern dystrophy; AVMD, adult vitelliform macular dystrophy; BPD, butterfly pattern dystrophy; LD, lumenal domain; TD, transmembrane domain; CD, cytoplasmic domain.

## **Supplementary Table 3.** Characteristics of *PRPH2*-IRD patients included in the CMT thickness quantitative analysis.

|  | **Total** | **RP** | **AVMD** | **CACD** | **PD** |
| --- | --- | --- | --- | --- | --- |
| Patients, n (%) | 32 (100%) | 14 (43.8%) | 4 (12.5%) | 9 (28.1%) | 5 (15.6%) |
| Eyes, n (%) | 59 (100%) | 26 (44.1%) | 8 (13.6%) | 16 (27.1%) | 9 (15.2%) |
| Age, y, mean±SD, range | 50.4±16.5 (22-73) | 51.6±11.8 (27-73) | 46.5±8.7 (35-56) | 55.9±11.4 (35-72) | 40.2±13.2 (22-55) |
| Gender, n (%) |  |  |  |  |  |
| Male | 19 (59.4%) | 8 (57.1%) | 2 (50.0%) | 5 (55.6%) | 4 (80.0%) |
| Female | 13 (40.6%) | 6 (42.9%) | 2 (50.0%) | 4 (44.4%) | 1 (20.0%) |
| Age of onset, y, mean±SD, range | 27.7±14.5 (1-60) | 21.3±12.9 (1-35) | 40.7±9.7 (30-49) | 27.0±19.2 (7-60) | 27.7±15.3 (16-45) |
| Disease duration, y, mean±SD, range | 23.1±16.4 (0-55) | 28.9±13.2 (6-52) | 2.7±2.5 (0-5) | 29.3±17.2 (12-55) | 9.7±3.5 (6-13) |
| Mean BCVA, logMAR, mean±SD | 1.00±0.73 | 0.73±0.77 | 0.48±0.23 | 1.56±0.65 | 0.63±0.49 |
| CMT thickness, Mean (SD) | 214.1 (63.6) | 239.4 (61.5) | 219.1 (53.1) | 97.9 (66.6) | 134.8 (73.6) |

**Abbreviation:** CMT, central macular thickness; RP, retinitis pigmentosa; AVMD, adult vitelliform macular dystrophy; CACD, central areolar choroidal dystrophy; PD, pattern dystrophy; logMAR, logarithm of the minimum angle of resolution.

## **Supplementary Table 4.** Characteristics of *PRPH2*-IRD patients included in the EZ thickness quantitative analysis.

|  | **Total** | **RP** | **AVMD** | **CACD/PD** |
| --- | --- | --- | --- | --- |
| Patients, n (%) | 19 (100%) | 11 (58.0%) | 4 (21.0%) | 4 (21.0%) |
| Eyes, n (%) | 34 (100%) | 19 (55.9%) | 8 (23.5%) | 7 (20.6%) |
| Age, y, mean±SD, range | 49.0±14.0 (22-73) | 51.0±12.2 (27-73) | 46.5±8.7 (35-56) | 44.5±15.8 (22-62) |
| Gender, n (%) |  |  |  |  |
| Male | 9 (100%) | 5 (%) | 2 (50.0%) | 2 (50.0%) |
| Female | 10 (100%) | 6 (%) | 2 (50.0%) | 2 (50.0%) |
| Age of onset, y, mean±SD, range | 27.6±12.2 (7-49) | 25.2±8.5 (7-35) | 40.7±9.7 (30-49) | 21.0±17.1 (7-40) |
| Disease duration, y, mean±SD, range | 20.9±16.8 (0-55) | 25.9±5.4 (6-52) | 2.7±2.5 (0-5) | 25.7±25.9 (6-55) |
| Mean BCVA, logMAR, mean±SD | 0.46±0.28 | 0.32±0.22 | 0.48±0.23 | 0.69±0.26 |
| EZ thickness, Mean (SD) | 23.5 (5.4) | 21.8 (3.1) | 30.2 (4.4) | 21.6 (2.2) |

**Abbreviation:** EZ, ellipsoid zone; RP, retinitis pigmentosa; AVMD, adult vitelliform macular dystrophy; CACD, central areolar choroidal dystrophy; PD, pattern dystrophy; logMAR, logarithm of the minimum angle of resolution.
